# Supplementary material for: Design and application of an open tubular capillary reactor for solid-phase permethylation of glycans in glycoprotein
Source: Royal Society of Chemistry journal article supplement (doi:10.1039/c4an01045k), 2014-12-24
Supplement: c4an01045k1.pdf [file c4an01045k1.pdf]

## Supporting Information

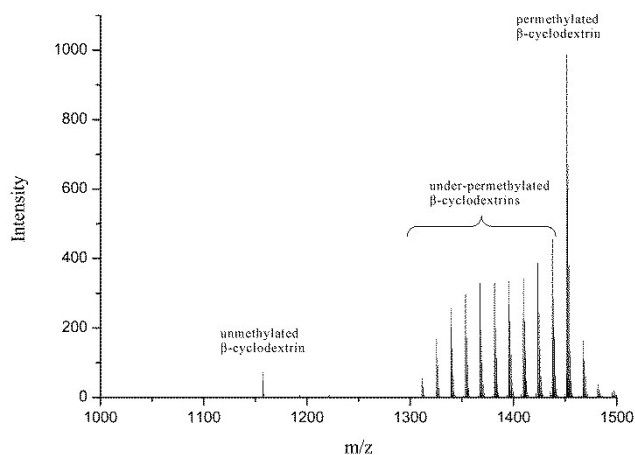

Figure S1. Permethylation of  $\beta$ -cyclodextrins in open-tubular capillary reactor with flow rate of  $2.0 \mu\text{L}/\text{min}$

Reactor:  $500 \mu\text{m.i.d.}$ ,  $32 \text{ cm}$  length

Table S1. Permethylation rates of  $\beta$ -cyclodextrins under different flow rates

| flow rate / $\mu\text{L}\cdot\text{min}^{-1}$ | Permethylation rate |        |        |        | SD    |
|-----------------------------------------------|---------------------|--------|--------|--------|-------|
|                                               | 1                   | 2      | 3      | avg    |       |
| 0.5                                           | 0.8777              | 0.7553 | 0.7238 | 0.7856 | 0.081 |
| 1.0                                           | 0.8234              | 0.8464 | 0.7453 | 0.8050 | 0.053 |
| 1.5                                           | 0.4317              | 0.4569 | 0.4916 | 0.4600 | 0.030 |
| 2.0                                           | 0.2826              | 0.2583 | 0.2187 | 0.2532 | 0.032 |
| 3.0                                           | 0.0351              | 0.0531 | 0.0633 | 0.0505 | 0.014 |

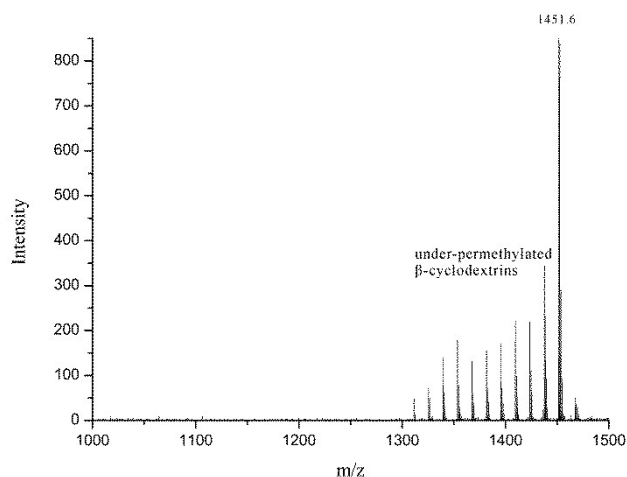

Figure S2. Permethylation of  $\beta$ -cyclodextrins in open-tubular capillary reactor with capillary length of  $20 \text{ cm}$

Reactor: 500  $\mu\text{m}$ ;; Flow rate: 1.0  $\mu\text{L}/\text{min}$

Table S2. Permethylation rates of  $\beta$ -cyclodextrins in reactors with different capillary lengths

| length / cm | Permethylation rate |        |        |        | SD    |
|-------------|---------------------|--------|--------|--------|-------|
|             | 1                   | 2      | 3      | avg    |       |
| 20          | 0.4374              | 0.3916 | 0.3398 | 0.3896 | 0.049 |
| 24          | 0.5938              | 0.5327 | 0.6188 | 0.5817 | 0.044 |
| 28          | 0.6834              | 0.6124 | 0.6349 | 0.6435 | 0.036 |
| 32          | 0.8234              | 0.8464 | 0.7453 | 0.8050 | 0.053 |
| 35          | 0.8620              | 0.8248 | 0.7894 | 0.8254 | 0.036 |

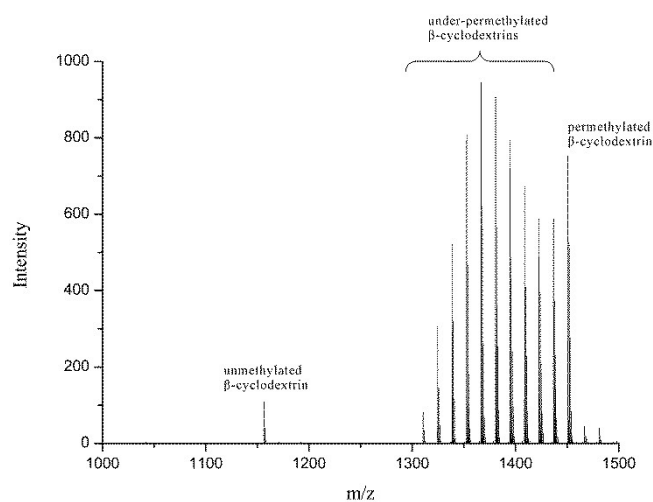

Figure S3. Permethylation of  $\beta$ -cyclodextrins in open-tubular capillary reactor with 320  $\mu\text{m}$  i.d. capillary

Reactor: 32 cm length; Flow rate: 1.0  $\mu\text{L}/\text{min}$

Table S3. Permethylation rates of  $\beta$ -cyclodextrins in reactors with different capillary inner diameters

| i.d. / $\mu\text{m}$ | Permethylation rate |        |        |        | SD    |
|----------------------|---------------------|--------|--------|--------|-------|
|                      | 1                   | 2      | 3      | avg    |       |
| 250                  | 0                   | 0      | 0      | 0      | 0     |
| 320                  | 0.1519              | 0.1176 | 0.1324 | 0.1340 | 0.017 |
| 450                  | 0.6201              | 0.5903 | 0.6724 | 0.6276 | 0.042 |
| 500                  | 0.8234              | 0.8464 | 0.7453 | 0.8050 | 0.053 |

Table S4. Reusability of the open-tubular capillary reactor

| Reusing times | Permethylation rate |        |        |        | SD    |
|---------------|---------------------|--------|--------|--------|-------|
|               | 1                   | 2      | 3      | avg    |       |
| 1             | 0.7976              | 0.8534 | 0.7837 | 0.8116 | 0.037 |
| 2             | 0.7778              | 0.7748 | 0.8383 | 0.7970 | 0.036 |
| 3             | 0.7859              | 0.7649 | 0.8485 | 0.7998 | 0.043 |
| 4             | 0.8483              | 0.7516 | 0.8134 | 0.8044 | 0.049 |

|    |        |        |        |        |       |
|----|--------|--------|--------|--------|-------|
| 5  | 0.7353 | 0.7973 | 0.8232 | 0.7853 | 0.045 |
| 6  | 0.7684 | 0.7271 | 0.7934 | 0.7630 | 0.033 |
| 7  | 0.6447 | 0.7219 | 0.6778 | 0.6815 | 0.039 |
| 8  | 0.5857 | 0.5740 | 0.5441 | 0.5679 | 0.021 |
| 9  | 0.3922 | 0.3975 | 0.4440 | 0.4112 | 0.028 |
| 10 | 0.2853 | 0.2520 | 0.2611 | 0.2661 | 0.017 |

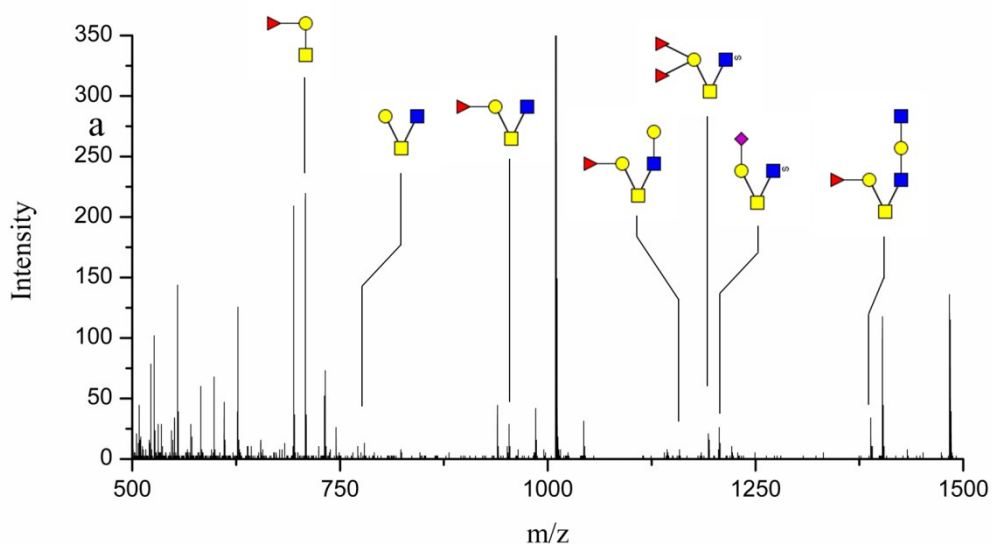

Figure S4. Permethylated O-glycans from 2.5  $\mu$ g mucin through open-tubular capillary reactor

Table S5. Data of the assignments showed in Figure 7a

| m/z       | Signal over noise ratio | Relative Intensity | Accuracy PPM |
|-----------|-------------------------|--------------------|--------------|
| 641.2542  | 14.88                   | 0.81               | 3.1126       |
| 708.3878  | 433.34                  | 20.27              | -14.2700     |
| 738.4007  | 10.89                   | 0.58               | -16.8527     |
| 779.4276  | 22.66                   | 1.20               | -16.4158     |
| 953.5232  | 66.76                   | 3.00               | -20.1815     |
| 1157.6372 | 20.66                   | 0.83               | -28.8626     |
| 1193.4287 | 96.10                   | 3.41               | 88.5578      |
| 1206.4613 | 55.46                   | 1.93               | 65.1724      |
| 1228.6716 | 6.93                    | 0.31               | -24.9852     |
| 1402.7510 | 322.91                  | 8.54               | -14.8919     |
| 1473.7816 | 11.40                   | 0.30               | -9.7544      |

Table S6. Data of the assignments showed in Figure 7b

| m/z      | Signal over noise ratio | Relative Intensity | Accuracy PPM |
|----------|-------------------------|--------------------|--------------|
| 708.3489 | 87.39                   | 80.96              | -10.7210     |
| 779.3832 | 16.55                   | 14.68              | 40.5514      |
| 953.4865 | 41.85                   | 25.96              | 18.3684      |

|                       |       |       |           |
|-----------------------|-------|-------|-----------|
| 1157.6044             | 23.78 | 12.29 | -0.5290   |
| 1193.6898 (discarded) | 17.85 | 10.28 | -130.1574 |
| 1206.8125 (discarded) | 6.39  | 3.67  | -234.3890 |
| 1228.6502             | 27.98 | 14.89 | -7.5681   |
| 1331.6853             | 51.13 | 28.19 | 5.7796    |
| 1402.7321             | 93.99 | 43.67 | -1.4184   |
| 1473.7528             | 42.25 | 18.40 | 9.7874    |

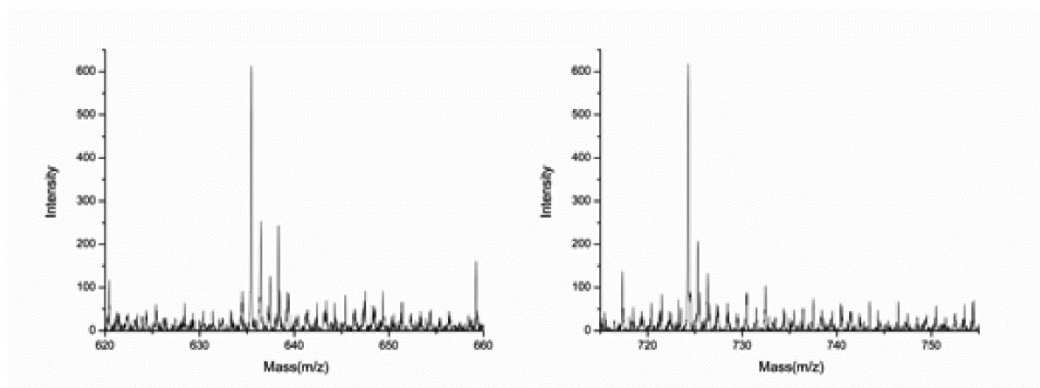

Fig

re S5. Zoomed-in spectras of Figure 7b
